# Supplementary material for: A novel green biorefinery strategy for corn stover by pretreatment with weak alkali-assisted deep eutectic solvents
Source: Royal Society of Chemistry journal article supplement (doi:10.1039/d3gc04091g), 2024-01-01
Supplement: d3gc04091g1.pdf [file d3gc04091g1.pdf]

## Supplementary materials

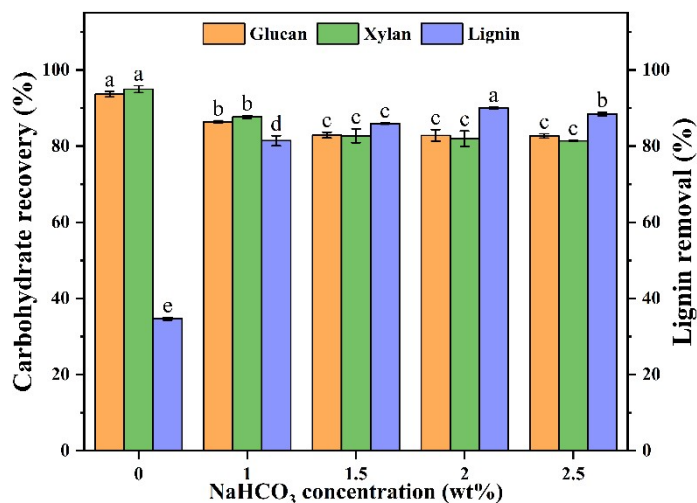

**Fig. S1.** Composition recoveries of DES pretreatment with different additions of NaHCO<sub>3</sub>.

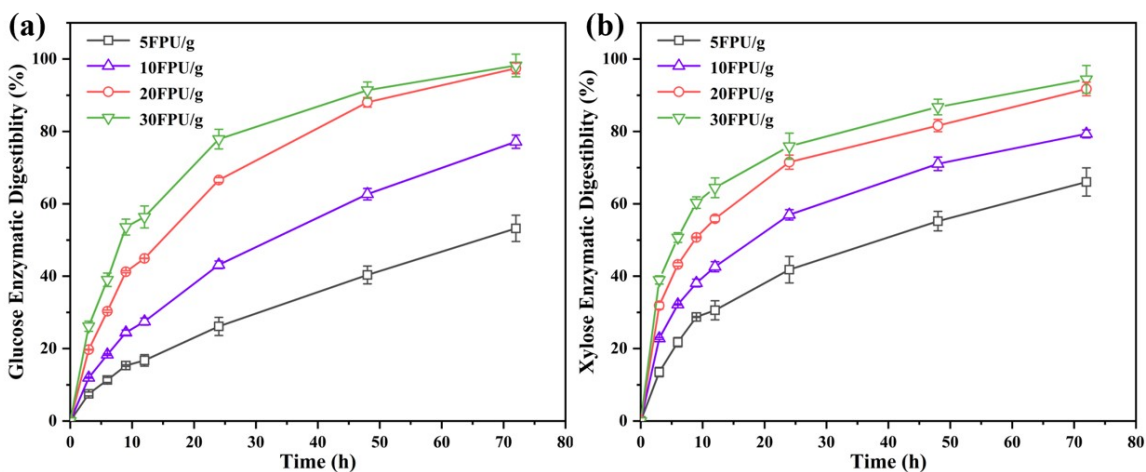

**Fig. S2.** Effects of different enzyme loads on the yield of glucose and xylose enzymatically hydrolyzed by pretreated CS.

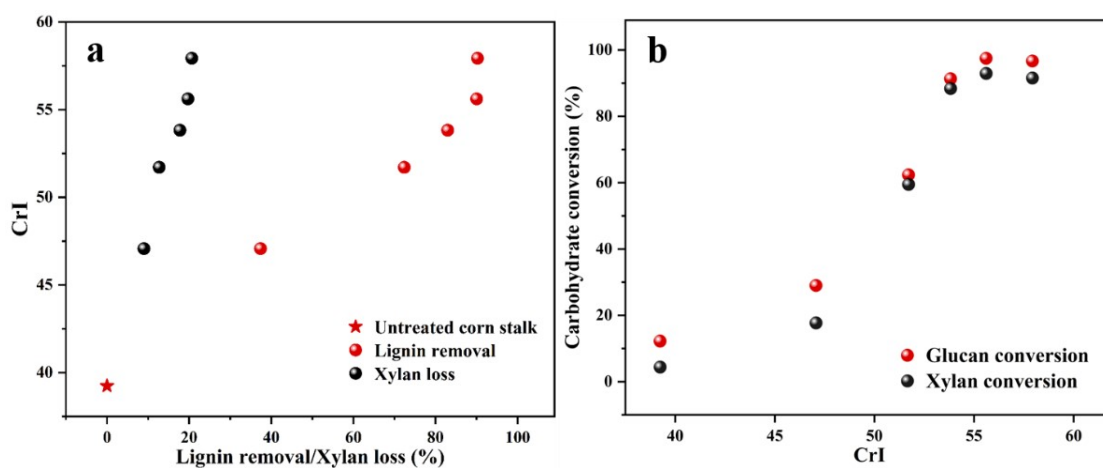

**Fig. S3.** Correlations (a) between CrI and lignin removal/xylan loss, (b) between CrI and Carbohydrate conversion.

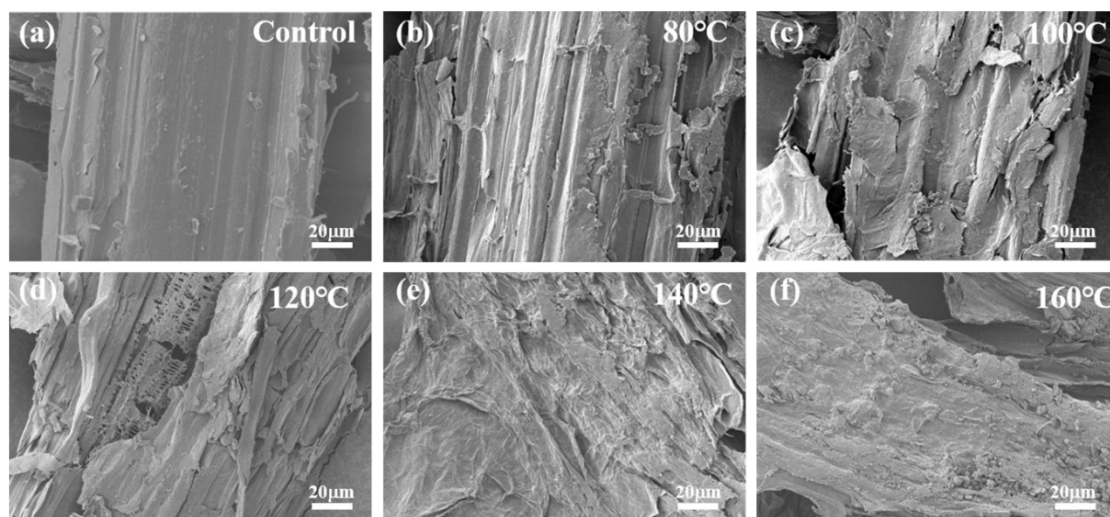

**Fig. S4.** (a) SEM images of untreated CR, samples treated at (b) 80°C, (c) 100°C, (d) 120°C, (e) 140°C, and (f) 160°C at different temperatures.

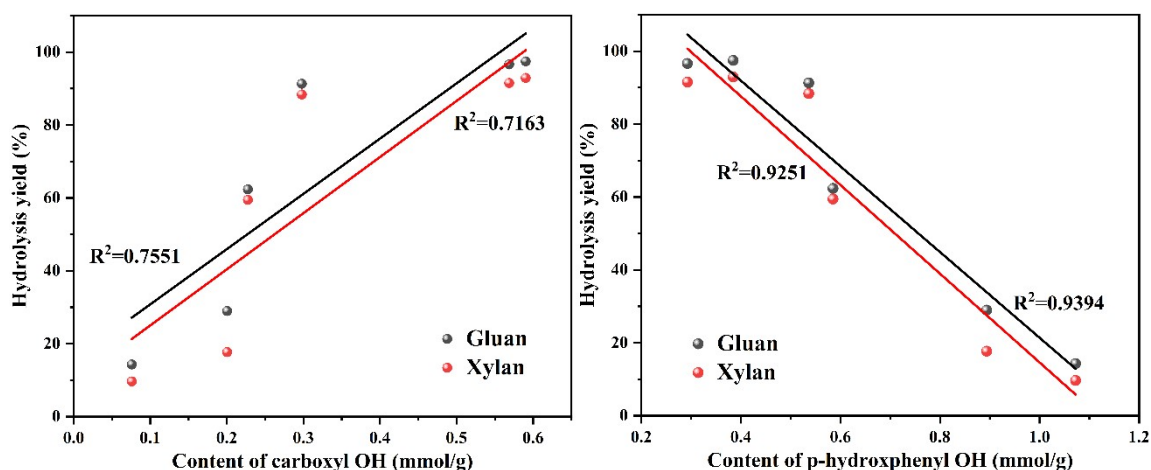

**Fig. S5.** Correlation between p-hydroxyphenyl OH(a), and carboxyl OH content (b) in lignins and the corresponding 72 hydrolysis yield.

**Table S1. Thermal parameters of the lignin**

| Sample | $T_{\text{peak}}(^{\circ}\text{C})$ |     | $\text{DTG}_{\text{max}}(\%/^{\circ}\text{C})$ |       | Solid(%) |
|--------|-------------------------------------|-----|------------------------------------------------|-------|----------|
|        | P1                                  | P2  | P1                                             | P2    |          |
| DEL    | 238                                 | 350 | -0.33                                          | -0.29 | 32.61    |
| L80    | 224                                 | 337 | -0.29                                          | -0.31 | 34.99    |
| L100   | 253                                 | 345 | -0.24                                          | -0.31 | 40.83    |
| L120   | 254                                 | 343 | -0.27                                          | -0.31 | 41.54    |
| L140   | 253                                 | 327 | -0.18                                          | -0.24 | 44.95    |
| L160   | 254                                 | 343 | -0.16                                          | -0.26 | 44.53    |

### File S1. Preparation of double enzymatic lignin (DEL)

The CS raw material was ball-milled using a planetary ball mill at 450 rpm for 5 h. Then, 5 g of the prepared CS sample was added to 100 mL of sodium citrate buffer (0.05 M, pH 4.80), shaken well, and then 60 FPU/g of cellulase was added. The following enzymatic hydrolysis process was carried out in a thermostatic incubation oscillator (50 °C, 120 rpm) for 48 h. The final mixture was centrifuged, and the residual solid was adequately washed with sodium citrate buffer (0.05 M, pH 4.80) and then freeze-dried. The dried residual solid was ball-milled again for 2 h and enzymatically digested. After the purification and freeze-drying process, DEL samples were obtained.
